# Supplementary material
Source: PubMed Central journal article supplement (PMC3858898)
Supplement: neo1511_1241SD1.pdf [file neo1511_1241SD1.pdf]

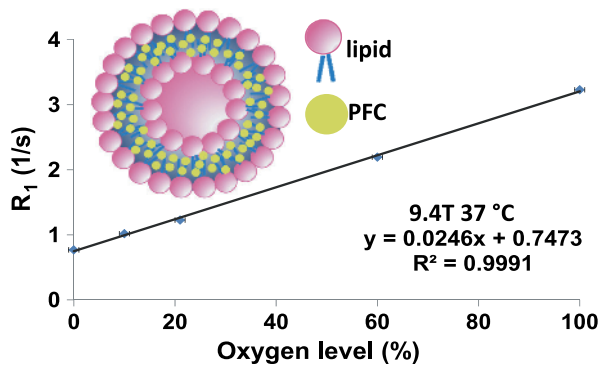

**Figure W1.** The linear relationship between the  $R_1$  of perfluoro-15-crown-5-ether and the oxygen level. The cartoon depicts the structure of the PFC emulsions that contain perfluoro-15-crown-5-ether (green) and a lipid bilayer (pink). Twenty-one percent of oxygen corresponds to 160 mm Hg, and 100% of oxygen corresponds to 760 mm Hg.

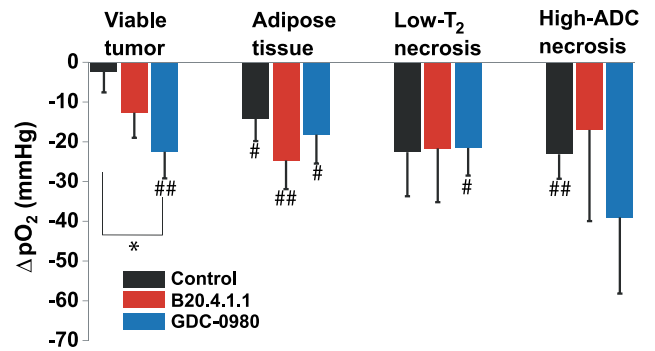

**Figure W2.** At 72 hours posttreatment, GDC-0980 significantly decreased  $pO_2$  in the viable tumor but not in the other tissue classes when compared with the control group ( $*P < .05$ ), whereas the B20.4.1.1-treated group showed no significant differences relative to the control ( $P > .05$ ).  $\#P < .05$  versus pretreatment;  $\##P < .01$  versus pretreatment level.
